# Supplementary material
Source: Springer Nature journal article supplement (https://www.springermedizin.de/resource/supplementary/12889_2012_4698_MOESM1_ESM.pdf/9493754)
Supplement: MOESM1 [file 9493754]

**Additional Table: Country data on EMIS national sample sizes, number ever tested for HIV, self-reported HIV diagnosis, and non-concordant unprotected anal intercourse (among respondents who never tested for HIV, and among respondents not tested in the last 12 months)**

| Top Level Domain | Country Name           | Sample size (N) | Ever tested | Ever tested | Diagnosed HIV       | Diagnosed HIV | ncUAI** in the previous 12 months (%) among men not tested in the last 12 months | ncUAI** in the previous 12 months % among men never tested for HIV*** |
|------------------|------------------------|-----------------|-------------|-------------|---------------------|---------------|----------------------------------------------------------------------------------|-----------------------------------------------------------------------|
|                  |                        | N               | %           | N           | % among tested men* |               |                                                                                  |                                                                       |
| ch               | Switzerland            | 5,028           | 3979        | 79.7%       | 453                 | 11.4%         | 21.3%                                                                            | 30.1%                                                                 |
| si               | Slovenia               | 990             | 507         | 52.5%       | 26                  | 5.1%          | 26.5%                                                                            | 32.9%                                                                 |
| lu               | Luxemburg              | 280             | 218         | 78.7%       | 29                  | 13.3%         | 19.9%                                                                            | 34.7%                                                                 |
| gr               | Greece                 | 2,944           | 1857        | 63.4%       | 237                 | 12.8%         | 28.9%                                                                            | 35.2%                                                                 |
| dk               | Denmark                | 1,742           | 1286        | 74.2%       | 152                 | 11.8%         | 28.8%                                                                            | 35.8%                                                                 |
| de               | Germany                | 54,387          | 37764       | 69.9%       | 4351                | 11.5%         | 27.1%                                                                            | 37.1%                                                                 |
| fr               | France                 | 11,164          | 9299        | 83.7%       | 1174                | 12.6%         | 24.0%                                                                            | 38.6%                                                                 |
| uk               | United Kingdom         | 17,718          | 12647       | 71.8%       | 1829                | 14.5%         | 31.5%                                                                            | 39.8%                                                                 |
| be               | Belgium                | 3,982           | 3210        | 81.2%       | 334                 | 10.4%         | 25.9%                                                                            | 40.2%                                                                 |
| at               | Austria                | 4,085           | 3054        | 75.2%       | 220                 | 7.2%          | 27.6%                                                                            | 40.9%                                                                 |
| es               | Spain                  | 13,111          | 9612        | 73.8%       | 1161                | 12.1%         | 33.0%                                                                            | 41.5%                                                                 |
| mk               | Macedonia              | 117             | 65          | 56.0%       | 5                   | 7.7%          | 38.2%                                                                            | 41.5%                                                                 |
| nl               | Netherlands            | 3,787           | 2997        | 79.5%       | 589                 | 19.7%         | 28.5%                                                                            | 41.8%                                                                 |
| cy               | Cyprus                 | 267             | 156         | 59.3%       | 2                   | 1.3%          | 38.8%                                                                            | 41.9%                                                                 |
| fi               | Finland                | 2,026           | 1265        | 62.8%       | 65                  | 5.1%          | 29.3%                                                                            | 42.6%                                                                 |
| ie               | Ireland                | 2,194           | 1379        | 63.1%       | 131                 | 9.5%          | 35.6%                                                                            | 42.6%                                                                 |
| it               | Italy                  | 15,984          | 11275       | 71.5%       | 1091                | 9.7%          | 33.2%                                                                            | 44.2%                                                                 |
| se               | Sweden                 | 3,132           | 2343        | 75.0%       | 149                 | 6.4%          | 29.6%                                                                            | 44.7%                                                                 |
| no               | Norway                 | 2,096           | 1373        | 65.9%       | 72                  | 5.2%          | 33.6%                                                                            | 45.3%                                                                 |
| hu               | Hungary                | 2,067           | 1189        | 57.9%       | 65                  | 5.5%          | 36.6%                                                                            | 45.8%                                                                 |
| ba               | Bosnia and Herzegovina | 150             | 65          | 43.9%       | 0                   |               | 42.4%                                                                            | 46.3%                                                                 |
| rs               | Serbia                 | 1,106           | 577         | 52.7%       | 31                  | 5.4%          | 39.7%                                                                            | 46.3%                                                                 |
| pt               | Portugal               | 5,187           | 3723        | 72.4%       | 405                 | 10.9%         | 36.7%                                                                            | 48.0%                                                                 |
| lv               | Latvia                 | 708             | 347         | 49.8%       | 27                  | 7.8%          | 43.2%                                                                            | 49.7%                                                                 |
| pl               | Poland                 | 2,746           | 1709        | 62.6%       | 140                 | 8.2%          | 39.2%                                                                            | 50.6%                                                                 |
| bg               | Bulgaria               | 1,036           | 650         | 63.2%       | 15                  | 2.3%          | 42.7%                                                                            | 51.2%                                                                 |
| hr               | Croatia                | 517             | 270         | 52.2%       | 13                  | 4.8%          | 40.7%                                                                            | 51.2%                                                                 |
| ee               | Estonia                | 594             | 355         | 60.5%       | 10                  | 2.8%          | 41.0%                                                                            | 51.5%                                                                 |
| lt               | Lithuania              | 595             | 251         | 42.7%       | 12                  | 4.8%          | 44.9%                                                                            | 52.6%                                                                 |
| cz               | Czech Republic         | 2,400           | 1339        | 56.2%       | 64                  | 4.8%          | 39.4%                                                                            | 52.8%                                                                 |
| mt               | Malta                  | 119             | 80          | 69.0%       | 2                   | 2.5%          | 35.7%                                                                            | 53.1%                                                                 |
| ua               | Ukraine                | 1,711           | 1009        | 59.4%       | 83                  | 8.2%          | 42.6%                                                                            | 53.6%                                                                 |
| sk               | Slovakia               | 586             | 274         | 47.0%       | 6                   | 2.2%          | 44.4%                                                                            | 54.2%                                                                 |
| md               | Moldova                | 117             | 69          | 59.0%       | 3                   | 4.3%          | 47.6%                                                                            | 54.8%                                                                 |
| ro               | Romania                | 2,327           | 1168        | 50.8%       | 59                  | 5.1%          | 49.1%                                                                            | 57.1%                                                                 |
| tr               | Turkey                 | 1,807           | 895         | 50.1%       | 25                  | 2.8%          | 51.6%                                                                            | 58.7%                                                                 |
| ru               | Russia                 | 5,035           | 3723        | 74.3%       | 316                 | 8.5%          | 41.8%                                                                            | 60.4%                                                                 |
| by               | Belarus                | 367             | 230         | 62.7%       | 7                   | 3.0%          | 51.5%                                                                            | 64.0%                                                                 |
|                  | Total                  | 174,209         | 122,209     |             | 13,353              |               |                                                                                  |                                                                       |
|                  | Min                    |                 |             | 42.7%       |                     | 1.3%          | 19.9%                                                                            | 30.1%                                                                 |
|                  | Median                 |                 |             | 63.0%       |                     | 7.2%          | 36.7%                                                                            | 45.6%                                                                 |
|                  | Max                    |                 |             | 83.7%       |                     | 19.7%         | 51.6%                                                                            | 64.0%                                                                 |

\* The proportions shown exclude missing answers on last HIV test result (N=1,223) and thus differ slightly from the proportions resulting from dividing the respective numbers with reported HIV through the numbers of men who ever tested for HIV.

\*\* ncUAI = non-concordant unprotected anal intercourse, i.e. with a sexual partner of unknown of serodiscordant HIV status

\*\*\* excluding men with HIV diagnosed longer than 12 months ago
